# Supplementary material
Source: PubMed Central journal article supplement (PMC6506263)

**Supplemental Table S1.** Plasmids used in this study

| Plasmid                                     | Genotype                                                                   | Source/Reference   |
|---------------------------------------------|----------------------------------------------------------------------------|--------------------|
| pTXB3                                       | pBR322 derivative, <i>amp<sup>R</sup></i>                                  | NEB                |
| <i>pcusS</i> <sub>(39-187)</sub>            | pTXB3/ <i>cusS</i> <sub>(39-187)</sub>                                     | Previous work (20) |
| <i>pStrep-cusS</i> <sub>(39-187)</sub> -WT  | pTXB3/ <i>cusS</i> <sub>(39-187)</sub> with N-terminal Strep tag and S192A | This work          |
| <i>pStrep-cusS</i> <sub>(39-187)</sub> -AIA | <i>pStrep-cusS</i> <sub>(39-187)</sub> -WT + H42A/F43I/H176A               | This work          |
| <i>pStrep-cusS</i> <sub>(39-187)</sub> -IIA | <i>pStrep-cusS</i> <sub>(39-187)</sub> -WT + M133I/M135I/H145A             | This work          |
|                                             |                                                                            |                    |
| pET21b(+)                                   | pBR322 ori, <i>lac</i> coding sequence, <i>amp<sup>R</sup></i>             | Novagen            |
| <i>pcusS</i> -WT                            | pET21b(+)/ <i>cusS</i> with C-terminal 6xHis tag                           | Previous work (22) |
| <i>pcusS</i> -H271A                         | pET21b(+)/ <i>cusS</i> -H271A                                              | This work          |
| <i>pcusS</i> -AIA                           | pET21b(+)/ <i>cusS</i> -H42A/F43I/H176A                                    | Previous work (22) |
| <i>pcusS</i> -IIA                           | pET21b(+)/ <i>cusS</i> -M133I/M135I/H145A                                  | Previous work (22) |
| <i>pcusS</i> <sub>cp</sub> -short           | pET21b(+)/ <i>cusS</i> <sub>cp</sub> -6xHis                                | This work          |
| <i>pcusS</i> <sub>cp</sub> -short-H271A     | pET21b(+)/ <i>cusS</i> <sub>cp</sub> -H271A                                | This work          |
| <i>pcusS</i> <sub>cp</sub> -short-AA        | pET21b(+)/ <i>cusS</i> <sub>cp</sub> -N386A/N414A                          | This work          |
| <i>pcusS</i> <sub>cp</sub> -short-AAA       | pET21b(+)/ <i>cusS</i> <sub>cp</sub> -H271A/N386A/N414A                    | This work          |
|                                             |                                                                            |                    |
| pET28b(+)                                   | pBR322 ori, <i>lac</i> coding sequence, <i>kan<sup>R</sup></i>             | Bio Basic          |
| <i>pcusS</i> <sub>cp</sub> -long            | pET28b(+)/ <i>cusS</i> <sub>cp</sub> -Strep-Myc-Strep-FLAG-HA-Strep        | This work          |
| <i>pcusS</i> <sub>cp</sub> -long-H271A      | pET28b(+)/ <i>cusS</i> <sub>cp</sub> -H271A                                | This work          |
| <i>pcusS</i> <sub>cp</sub> -long-AA         | pET28b(+)/ <i>cusS</i> <sub>cp</sub> -N386A/N414A                          | This work          |
| <i>pcusS</i> <sub>cp</sub> -long-AAA        | pET28b(+)/ <i>cusS</i> <sub>cp</sub> -H271A/N386A/N414A                    | This work          |
|                                             |                                                                            |                    |
| pET22b(+)                                   | pBR322 ori, <i>lac</i> coding sequence, <i>amp<sup>R</sup></i>             | Novagen            |
| <i>pcusR</i>                                | pET22b(+)/ <i>cusR</i> -6xHis                                              | This work          |
| <i>pcusR</i> -D51A                          | pET22b(+)/ <i>cusR</i> -D51A-6xHis                                         | This work          |

**Supplemental Table S2.** Bacterial strains used for *in vivo* complementation assay

| Strain       | Genotype                                                                                                                   | Source/Reference                           |
|--------------|----------------------------------------------------------------------------------------------------------------------------|--------------------------------------------|
| BW25113      | <i>lacI<sup>q</sup>, rrrB<sub>T14</sub>, ΔlacZ<sub>WJ16</sub>, hsdR514, ΔaraBAD<sub>AH33</sub>, ΔrhaBAD<sub>LD78</sub></i> | Datsenko & Wanner (35),<br>Baba et al (34) |
| JW5082-1     | BW25113/ <i>ΔcusS::kan<sup>R</sup></i>                                                                                     | Baba et al (34)                            |
| JW0560-1     | BW25113/ <i>ΔcusR::kan<sup>R</sup></i>                                                                                     | Baba et al (34)                            |
| WT           | BW25113/ <i>ΔcueO::cat<sup>R</sup>/pET21b(+)</i> or<br><i>pET22b(+)</i>                                                    | Previous work (22); This<br>work           |
| <i>ΔcusS</i> | BW25113/ <i>ΔcueOΔcusS/pET21b(+)</i>                                                                                       | Previous work (22)                         |
| <i>ΔcusR</i> | BW25113/ <i>ΔcueOΔcusR/pET22b(+)</i>                                                                                       | This work                                  |

**Supplemental Figure S1.** *In vitro* crosslinking reactions of apo and Ag(I)- CusS<sub>(39-387)</sub> wild-type and mutants. (A) Apo- and Ag(I)- CusS<sub>(39-387)</sub> samples (10 μM) in the presence and absence of BS<sup>3</sup> crosslinker were analyzed by SDS-PAGE followed by silver staining. The expected monomer (~18 kDa) CusS<sub>(39-387)</sub> is indicated by (\*) and the expected dimer (~36 kDa) is indicated by (\*\*). Experiment was repeated twice; a representative experiment is shown. (B) The relative densities of the dimers (\*\*) were calculated and normalized to the apo proteins. Student's t test was used to calculate the *P* value. Error bars indicate standard deviations of duplicate experiments.

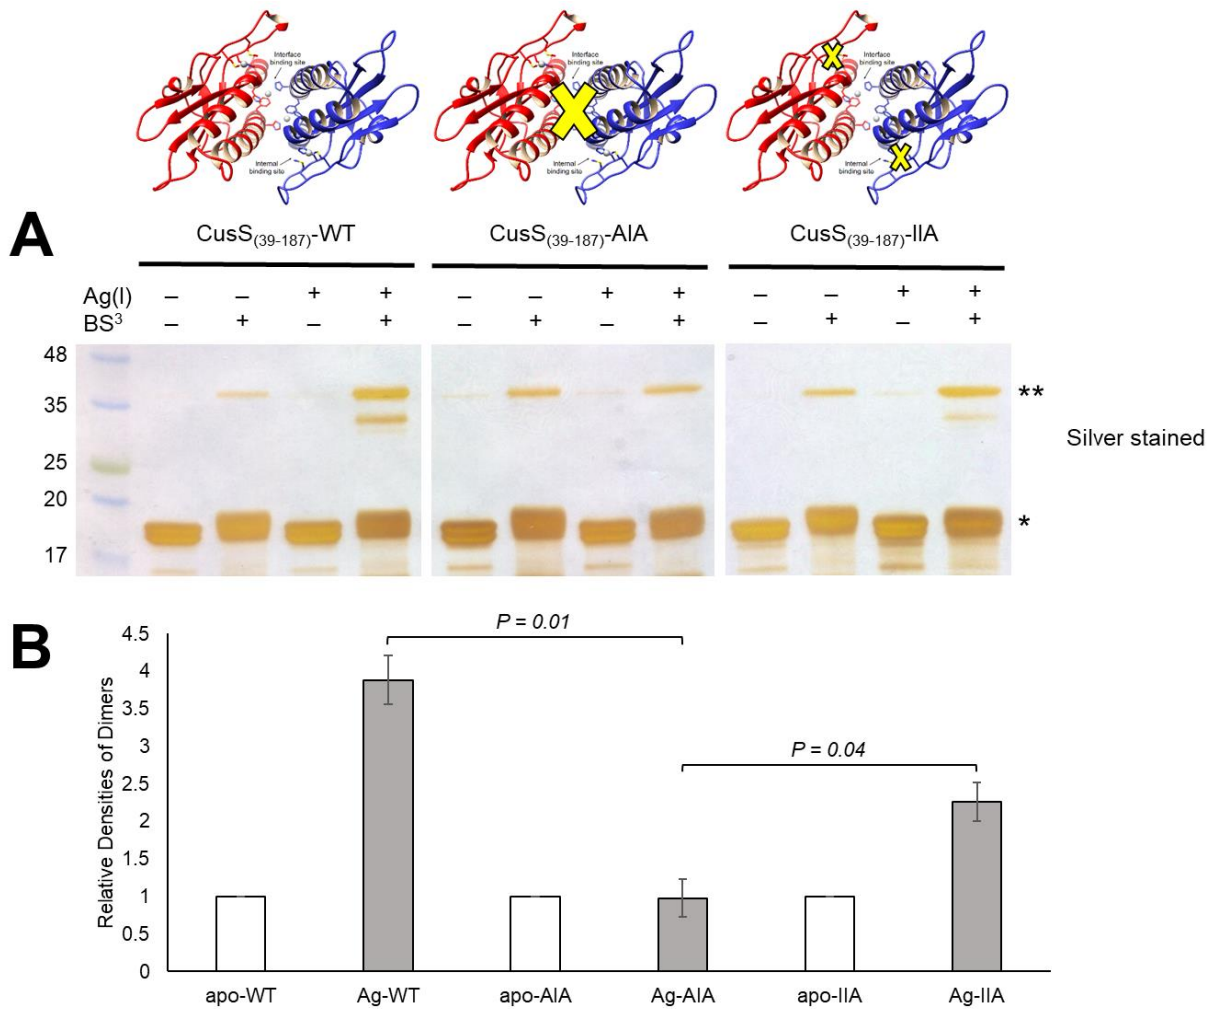

**Supplemental Figure S2.** Relative expression levels of (A) CusS-WT/H271A from pET21b(+) plasmids and (B) CusR-WT/D51A from pET22b(+) plasmids. Cells were grown at 37°C for 2 hr, then cells were induced with 1 mM IPTG and 0.5 mM CuSO<sub>4</sub> and continued shaking at 37°C for 6 hr. Cells were normalized to the same OD<sub>600</sub> before collecting the pellets. Anti-His tag antibody was used to probe the expressed proteins.

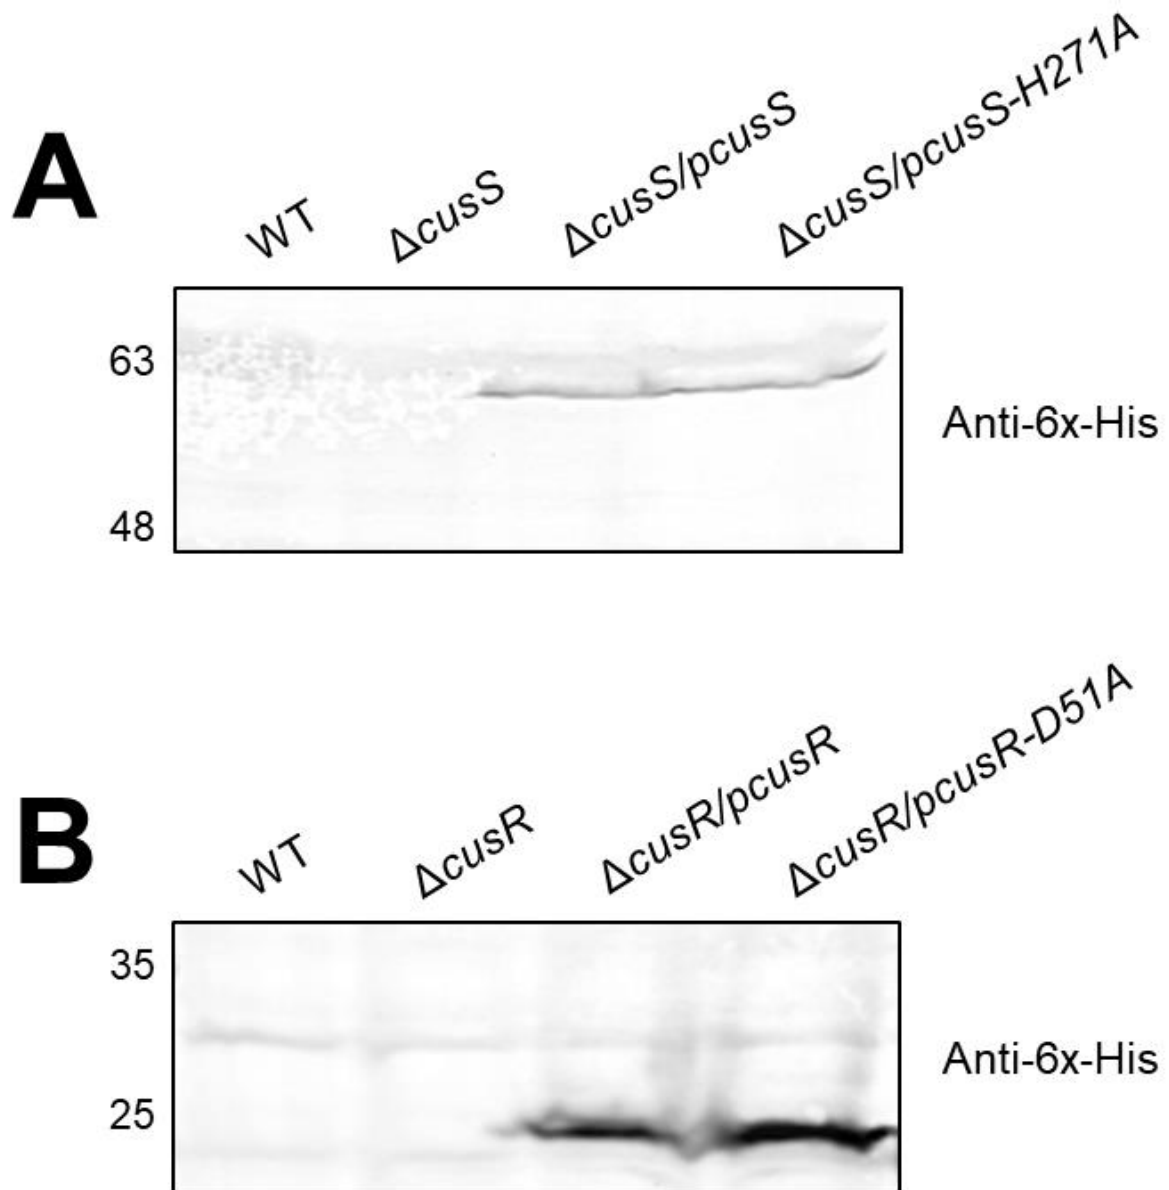

**Supplemental Figure S3.** (A) Sequence alignment of the entire cytoplasmic domain of *E. coli* CusS (CusS<sub>cp</sub>, residues 208-480) and *E. coli* CpxA (CpxA<sub>HDC</sub>, residues 188-455). The conserved catalytic His residues are indicated with white text and highlighted in black. Two residues (S238 and P253) that are responsible in causing helical bending in CpxA<sub>HDC</sub> structure are highlighted in green. Conserved residues are labeled with asterisks (\*). (B) 3D structure of the cytoplasmic domain of *E. coli* CusS (residues 208-480) predicted by Robetta (60). This structure was predicted based on the structure of the cytoplasmic domain of *E. coli* CpxA (PDB entry 4BIU (54)), which shares significant sequence homology with CusS<sub>cp</sub> (31.1% identity, 47.9% similarity, calculated by EMBOSS Needle). The catalytic H271 residue is shown in magenta stick representation. Two residues (R261 and P276) that correspond to S238 and P253 on CpxA<sub>HDC</sub> are shown in green sticks. An ADP molecule adapted from PDB entry 4BIU is shown in line representation in the CA domain. The domains of CusS are labeled as HAMP, histidine kinase, adenylyl cyclases, methyl-accepting proteins, phosphatases; DHp, dimerization and histidine phosphotransfer; CA, catalytic and ATP binding domain.

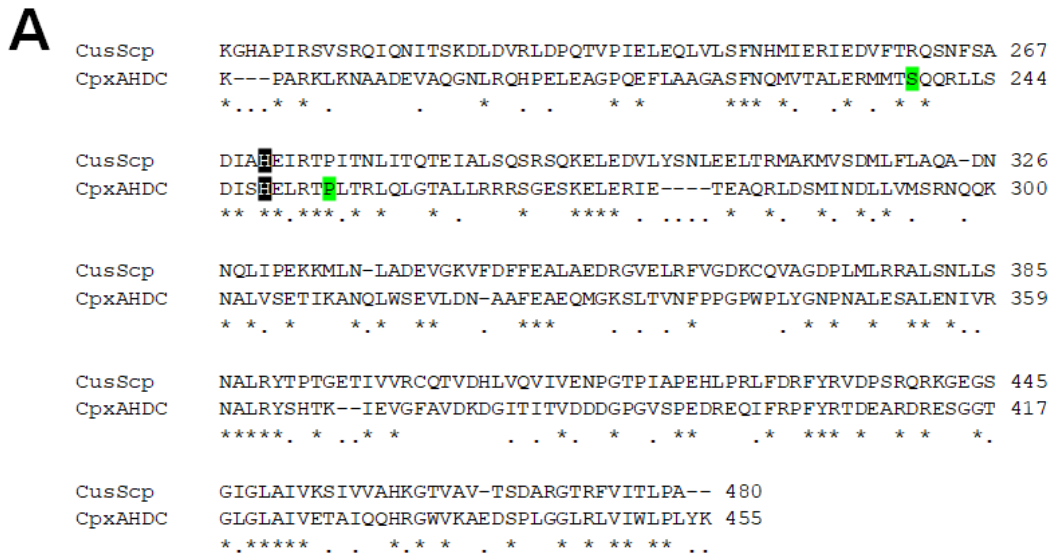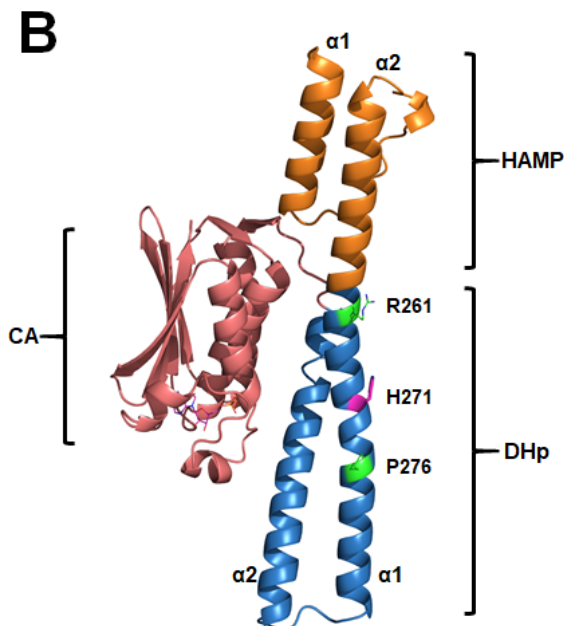

Supplement: NIHMS1021994-supplement-Supp_tabels_and_figures.pdf [file NIHMS1021994-supplement-Supp_tabels_and_figures.pdf]
